# Supplementary material for: ggMOB: Elucidation of genomic conjugative features and associated cargo genes across bacterial genera using genus-genus mobilization networks
Source: Front Genet. 2022 Dec 8;13:1024577. doi: 10.3389/fgene.2022.1024577 (PMC9779932; doi:10.3389/fgene.2022.1024577)
Supplement: Supplementary file 2 [file DataSheet3.XLSX]

## Sheet: bootstrapRand_resistant1K
Antimicrobial Drug	Number of Resistant Genomes	Number of Resistant Conjugative Genomes	Proportion Conjugative Genomes	Expected Proportion Conjugative Genomes, if Random Process	Error
cefalexin	3	2	0.666667	0.105333	0.165916
sulbactam	3	2	0.666667	0.105333	0.165916
ticarcillin-clavulanic acid	21	12	0.571429	0.097	0.0667155
doxycycline	2	1	0.5	0.097	0.21367
nalidixic acid	2	1	0.5	0.0935	0.21247
piperacillin	6	3	0.5	0.102333	0.12105
doripenem	215	105	0.488372	0.0993907	0.0201569
ertapenem	222	103	0.463964	0.0983018	0.0203181
piperacillin-tazobactam	280	112	0.4	0.0988643	0.0181601
cefepime	272	108	0.397059	0.0991434	0.0180824
amoxicillin-clavulanic acid	277	104	0.375451	0.0984332	0.0181768
meropenem	402	118	0.293532	0.098306	0.0147324
kanamycin	7	2	0.285714	0.0985714	0.109497
tigecycline	14	4	0.285714	0.0995714	0.0756932
imipenem	429	118	0.275058	0.0983823	0.0143837
chloramphenicol	8	2	0.25	0.099375	0.10586
polymyxin B	9	2	0.222222	0.0975556	0.0992311
sulfisoxazole	17	3	0.176471	0.0986471	0.0723903
levofloxacin	741	124	0.167341	0.0985655	0.011066
tobramycin	674	109	0.161721	0.0987166	0.0116022
ceftazidime	852	127	0.149061	0.0985634	0.010574
streptomycin	21	3	0.142857	0.0995714	0.0644605
ciprofloxacin	915	125	0.136612	0.0986546	0.00992501
cefoxitin	757	101	0.133421	0.0982114	0.0106522
ceftiofur	8	1	0.125	0.096	0.105371
cefotaxime	889	111	0.124859	0.0984949	0.0104118
aztreonam	989	123	0.124368	0.098366	0.0097841
trimethoprim-sulfamethoxazole	868	95	0.109447	0.0986567	0.0102623
ampicillin	1042	112	0.107486	0.0983109	0.00963546
cefazolin	1002	107	0.106786	0.0983373	0.0098128
ceftriaxone	984	104	0.105691	0.0984553	0.0098303
colistin	19	2	0.105263	0.0972632	0.0718763
cefuroxime	21	2	0.0952381	0.0957143	0.0675808
minocycline	12	1	0.0833333	0.101917	0.0828294
gentamicin	813	55	0.0676507	0.0986113	0.0107327
tetracycline	700	39	0.0557143	0.0985643	0.0116232
amikacin	383	20	0.0522193	0.0987781	0.015396
ampicillin-sulbactam	433	18	0.0415704	0.0984642	0.0144371
moxifloxacin	61	2	0.0327869	0.0978525	0.0387813
cefotetan	124	1	0.00806452	0.0982258	0.0264237
nitrofurantoin	713	3	0.00420757	0.0983787	0.011353
amoxicillin	3	0	0	0.099	0.171016
cefotaxime-clavulanic acid	9	0	0	0.0983333	0.0983614
cephalothin	2	0	0	0.1	0.213988
clindamycin	8	0	0	0.096375	0.108824
erythromycin	38	0	0	0.0965263	0.0494569
fosfomycin	7	0	0	0.100429	0.11448
oxacillin	1	0	0	0.101	0.294483
penicillin	5	0	0	0.0926	0.132901
rifampin	1	0	0	0.102	0.292873
sulfamethoxazole	2	0	0	0.1	0.213988
