# Supplementary material for: ggMOB: Elucidation of genomic conjugative features and associated cargo genes across bacterial genera using genus-genus mobilization networks
Source: Front Genet. 2022 Dec 8;13:1024577. doi: 10.3389/fgene.2022.1024577 (PMC9779932; doi:10.3389/fgene.2022.1024577)
Supplement: Supplementary file 4 [file DataSheet2.XLSX]

## Sheet: cargo_AMR_COUNT_by_IPRorTAB_ICE
AMR Proteins Name*	Non-ICE	IPR005094		*The list of AMR protein names has been filtered to only include those that appeared at least 2x more frequently in conjugative versus non-conjugative genomes
Beta-lactamase Toho-1	1	227
AcrAD-TolC multidrug efflux transport system - permease subunit	1	96.375
multidrug efflux RND transporter permease subunit OqxB3	1	96.375
MdtEF-TolC multidrug efflux transport system - membrane fusion protein	1	70.0909
Carbapenem-hydrolyzing beta-lactamase KPC	1	56.7368
Aclacinomycin methylesterase RdmC	1	44.2
Beta-lactamase OXA-10	1	40
Beta-lactamase OXA-2	1	33.75
chloramphenicol efflux MFS transporter CmlA1	1	31.5385
Beta-lactamase OXA-1	1	30.7333
dihydrofolate reductase DfrD_2	1	29
Dihydrofolate reductase type 3	1	29
tetracycline resistance ribosomal protection protein Tet(32)	1	25
Inner membrane transport protein YdhC	1	22.75
putative transport protein YdhC	1	21.25
Beta-lactamase SHV-2	1	17.1667
DNA topoisomerase IV subunit A	1	16
SPBc2 prophage-derived aminoglycoside N(3)-acetyltransferase-like protein YokD	1	14.0154
Tetracycline resistance protein TetM from transposon TnFO1	1	14
galactoside O-acetyltransferase monomer	1	12.6
Glutathione transferase FosA	1	12.1739
Lincosamide nucleotidyltransferase	1	12
phosphoethanolamine--lipid A transferase MCR-1.1	1	11.7778
putative metal-dependent hydrolase	1	11.7778
putative phosphatidylethanolamine transferase Mcr-1	1	11.7778
ABC-F type ribosomal protection protein Lsa(E)	1	10.8
drug resistance ABC transporter ATP-binding protein	1	10.8
translation elongation factor G	1	10.7692
DNA topoisomerase IV subunit B	1	10.6667
Beta-lactamase TEM	1	9.03734
Dihydrofolate reductase type 1	1	8.83219
16S rRNA (guanine(1405)-N(7))-methyltransferase	1	8.35294
Beta-lactamase CTX-M-97	1	7.88889
Aminoglycoside 6-adenylyltransferase	1	7.88372
multidrug efflux transporter MdtG	1	7.80952
YajR MFS transporter	1	7.22549
chloramphenicol efflux MFS transporter CmlA5	1	7.16667
maltose acetyltransferase	1	6.75862
Bicyclomycin resistance protein	1	6.45455
multidrug efflux transporter Bcr	1	6.45455
Pentapeptide repeat protein	1	6.23529
Streptomycin adenyltransferase	1	6.19328
Beta-lactamase SHV-1	1	6.11392
Beta-lactamase OXY-2	1	5.7
dTDP-fucosamine acetyltransferase	1	5.64356
Elongation factor Tu 1	1	5.52381
Beta-lactamase CTX-M-1	1	5.31301
Lincosamide resistance protein	1	5
Tetracycline repressor protein class A from transposon 1721	1	5
Metallo-beta-lactamase type 2	1	4.88235
Multidrug resistance protein MdtG	1	4.61181
DNA gyrase A subunit GyrA	1	4.25
dihydropteroate synthase	1	4.14182
Vancomycin B-type resistance protein VanB	1	4
response regulator OmpR	1	3.98
Transcriptional regulatory protein WalR	1	3.98
Tetracycline resistance protein class C	1	3.94184
putative regulatory protein VanR	1	3.90385
VanZ like family protein	1	3.89796
VanY protein D-alanyl-D-alanine carboxypeptidase	1	3.575
D-alanyl-D-alanine carboxypeptidase	1	3.55
Tetracycline resistance protein TetO	1	3.53165
tetracycline resistance ribosomal protection protein Tet(O)	1	3.47552
D-lactate dehydrogenase	1	3.46875
D-specific alpha-keto acid dehydrogenase	1	3.46875
VanH protein D-specific alpha-keto acid dehydrogenase	1	3.46875
D-alanyl-D-alanine dipeptidase	1	3.28
Chloramphenicol acetyltransferase	1	3.08626
putative ABC transporter ATP-binding protein YheS	1	3.0404
D-alanyl-alanine synthetase A	1	3
Vancomycin/teicoplanin A-type resistance protein VanA	1	3
Vancomycin B-type resistance protein vanB D-alanine--D-lactate ligase	1	2.88889
putative ABC transporter ATP-binding protein	1	2.85714
dihydrofolate reductase	1	2.68737
ABC-F type ribosomal protection protein Msr(D)	1	2.6383
2-aminoglycoside nucleotidyltransferase	1	2.53191
Inner membrane transport protein YdhP	1	2.4
Transcriptional regulatory protein CpxR	1	2.35585
putative DNA-binding response regulator in two-component system with YedV	1	2.35181
beta-lactamase; penicillin resistance	1	2.28199
Dihydrofolate reductase	1	2.1142
chloramphenicol/florfenicol efflux MFS transporter FexA	1	2
hexapeptide repeat-containing acetyltransferase	1	2
IS1595 family transposase ISCco2	1	2
major facilitator superfamily multidrug :cation symporter	1	2
Beta-lactamase OXA-18	1	1.96538
putative MFS-type transporter	1	1.88976
Aminoglycoside 3-phosphotransferase	1	1.87033
Efflux pump membrane transporter BepE	1	1.7765
drug resistance MFS transporter drug:H+ antiporter-2 (DHA2) family protein	1	1.69173
Outer membrane protein F	1	1.68899
Extended-spectrum beta-lactamase PER-1	1	1.65854
Beta-lactamase OXY-1	1	1.63636
tetracycline efflux MFS transporter Tet(L)	1	1.63359
elongation factor Tu	1	1.5
Transcriptional regulatory protein SrrA	1	1.45455
acetyltransferase	1	1.44224
streptothricin acetyltransferase	1	1.44224
Riboflavin transporter RibZ	1	1.42667
IS1595 family transposase ISSsu9	1	1.28536
Aminoglycoside N(6)-acetyltransferase type 1	1	1.27544
Efflux pump periplasmic linker BepF	1	1.25914
Beta-lactamase PSE-1	1	1.19672
putative ABC transporter ATP-binding protein YbiT	1	1.06294
bifunctional acetyltransferase/phosphotransferase	1	1.01902
ABC-F type ribosomal protection protein Msr(E)	1	1.01399
putative ATP-binding component of a transport system	1	1.01399
DNA topoisomerase subunit A	1	1
putative tetracycline resistance protein	1	0.915094
trimethoprim-sensitive dihydrofolate reductase	1	0.893761
chloramphenicol efflux MFS transporter CmlA6	1	0.888889
inner membrane protein HsrA	1	0.780632
putative transport protein HsrA	1	0.780632
tetracycline efflux MFS transporter Tet(K)	1	0.780632
putative GST-like protein YibF	1	0.75
Ribosomal RNA large subunit methyltransferase H	1	0.716981
rRNA large subunit methyltransferase	1	0.716981
Tetracycline repressor protein class H	1	0.714286
DNA topoisomerase 4 subunit B	1	0.682733
Dihydropteroate synthase	1	0.664493
Tetracycline resistance protein class B	1	0.597326
Transcriptional regulatory protein QseB	1	0.541667
DNA topoisomerase subunit B	1	0.372685
Beta-lactamase	1	0.35755
DNA topoisomerase 4 subunit A	1	0.350936
MATE family multidrug efflux pump protein	1	0.336735
Metallothiol transferase FosB	1	0.335753
fosfomycin resistance protein FosB	1	0.330922
MATE family multi-antimicrobial extrusion protein	1	0.319703
Multidrug export protein MepA	1	0.319703
putative acetyltransferase	1	0.3125
Multidrug efflux pump subunit AcrA	1	0.235632
Beta-lactamase OXA-133	1	0.225139
Elongation factor Tu 2	1	0.162162
DNA topoisomerase (ATP-hydrolyzing) ParC	1	0.105116
HTH-type transcriptional regulator SyrM 1	1	0.0653595
Sensor protein QseC	1	0.0434783
Virulence sensor histidine kinase PhoQ	1	0.0304878
Virulence transcriptional regulatory protein PhoP	1	0.00456621
Right origin-binding protein	1	0
Virginiamycin A acetyltransferase	1	0
